# Supplementary material for: Willing or Hesitant? A Socioeconomic Study on the Potential Acceptance of COVID-19 Vaccine in Japan
Source: MDPI journal article supplement (doi:10.3390/ijerph18094864), 2021-05-02
Supplement: s1 [file s1]

**Table: Correlation matrix**

| <b>Variables</b>            | <b>Willingness to take vaccine</b> | <b>Vaccine hesitancy</b> | <b>Male</b> | <b>Age</b> | <b>Age squared</b> | <b>University degree</b> | <b>Live in central area</b> | <b>Marriage</b> | <b>Children</b> |
|-----------------------------|------------------------------------|--------------------------|-------------|------------|--------------------|--------------------------|-----------------------------|-----------------|-----------------|
| Willingness to take vaccine | 1                                  |                          |             |            |                    |                          |                             |                 |                 |
| Vaccine hesitancy           | -0.8518                            | 1                        |             |            |                    |                          |                             |                 |                 |
| Male                        | 0.1266                             | -0.1094                  | 1           |            |                    |                          |                             |                 |                 |
| Age                         | 0.1967                             | -0.1958                  | 0.3299      | 1          |                    |                          |                             |                 |                 |
| Age squared                 | 0.2074                             | -0.2094                  | 0.3127      | 0.9891     | 1                  |                          |                             |                 |                 |
| University degree           | 0.0631                             | -0.0618                  | 0.2159      | 0.0107     | 0.0128             | 1                        |                             |                 |                 |
| Live in central area        | 0.0228                             | -0.016                   | 0.0505      | 0.0573     | 0.0511             | 0.1323                   | 1                           |                 |                 |
| Marriage                    | 0.1112                             | -0.1008                  | 0.05        | 0.2167     | 0.2139             | 0.0642                   | 0.0121                      | 1               |                 |
| Children                    | 0.1557                             | -0.1385                  | 0.0955      | 0.367      | 0.362              | 0.0144                   | -0.0391                     | 0.5886          | 1               |
| Live alone                  | -0.0658                            | 0.0583                   | -0.0256     | -0.1304    | -0.124             | -0.0111                  | 0.0088                      | -0.6709         | -0.4305         |
| Employed                    | -0.0137                            | 0.024                    | 0.2974      | -0.2518    | -0.2858            | 0.1711                   | 0.0122                      | -0.1008         | -0.0989         |
| Log of household income     | 0.082                              | -0.0711                  | 0.0663      | -0.0292    | -0.0478            | 0.233                    | 0.104                       | 0.3581          | 0.2408          |
| Log of household assets     | 0.1157                             | -0.1247                  | 0.0909      | 0.2975     | 0.2911             | 0.2268                   | 0.1244                      | 0.1186          | 0.1157          |
| Financial literacy          | 0.0982                             | -0.1021                  | 0.2444      | 0.2263     | 0.2146             | 0.278                    | 0.0851                      | 0.0446          | 0.0537          |
| Subjective health           | 0.1166                             | -0.1222                  | -0.0098     | 0.0169     | 0.0271             | 0.0571                   | -0.0044                     | 0.0576          | 0.0564          |
| Future anxiety              | -0.0168                            | 0.0305                   | -0.1169     | -0.166     | -0.1758            | -0.1051                  | -0.0552                     | -0.1028         | -0.1189         |
| Level of risk preference    | -0.0388                            | 0.0332                   | -0.0194     | -0.1174    | -0.1121            | -0.0891                  | -0.1302                     | 0.0131          | -0.0095         |
| Myopic view of the future   | -0.049                             | 0.0527                   | -0.048      | -0.0175    | -0.0183            | -0.107                   | -0.024                      | -0.0716         | -0.0403         |

**Table: Correlation matrix (continue)**

| <b>Variables</b>          | <b>Live alone</b> | <b>Employed</b> | <b>Log of household income</b> | <b>Log of household assets</b> | <b>Financial literacy</b> | <b>Subjective health</b> | <b>Future anxiety</b> | <b>Level of risk preference</b> | <b>Myopic view of the future</b> |
|---------------------------|-------------------|-----------------|--------------------------------|--------------------------------|---------------------------|--------------------------|-----------------------|---------------------------------|----------------------------------|
| Live alone                | 1                 |                 |                                |                                |                           |                          |                       |                                 |                                  |
| Employed                  | 0.116             | 1               |                                |                                |                           |                          |                       |                                 |                                  |
| Log of household income   | -0.3173           | 0.3168          | 1                              |                                |                           |                          |                       |                                 |                                  |
| Log of household assets   | -0.1234           | -0.002          | 0.4008                         | 1                              |                           |                          |                       |                                 |                                  |
| Financial literacy        | -0.0161           | 0.054           | 0.1512                         | 0.2991                         | 1                         |                          |                       |                                 |                                  |
| Subjective health         | -0.0122           | 0.0267          | 0.1118                         | 0.0855                         | 0.0255                    | 1                        |                       |                                 |                                  |
| Future anxiety            | 0.0428            | 0.0246          | -0.1578                        | -0.3094                        | -0.0966                   | -0.1173                  | 1                     |                                 |                                  |
| Level of risk preference  | -0.012            | 0.0226          | -0.0336                        | -0.1116                        | -0.0899                   | 0.0124                   | 0.0462                | 1                               |                                  |
| Myopic view of the future | 0.0454            | -0.032          | -0.0803                        | -0.1112                        | -0.1327                   | 0.0377                   | -0.0555               | 0.0367                          | 1                                |

**Table: Variance Inflation Factor (VIF) test**

| <b>Variables</b>          | <b>VIF</b>  | <b>1/VIF</b> |
|---------------------------|-------------|--------------|
| Marriage                  | 2.4         | 0.416724     |
| Live alone                | 1.9         | 0.525766     |
| Log of household income   | 1.76        | 0.569352     |
| Children                  | 1.73        | 0.57788      |
| Age                       | 1.72        | 0.582403     |
| Log of household assets   | 1.57        | 0.636696     |
| Employed                  | 1.53        | 0.654954     |
| Male                      | 1.46        | 0.68496      |
| Financial literacy        | 1.23        | 0.810928     |
| University degree         | 1.21        | 0.82433      |
| Future anxiety            | 1.15        | 0.866086     |
| Live in central area      | 1.05        | 0.949535     |
| Myopic view of the future | 1.05        | 0.955529     |
| Level of risk preference  | 1.04        | 0.95712      |
| <b>Mean VIF</b>           | <b>1.46</b> |              |
